# Supplementary material
Source: publisher site journal article supplement (https://www.spandidos-publications.com/4632/downloadSupplementary)
Supplement: Supplementary file 2 [file downloadSupplementary]

## Sheet: Table SⅤ catRAPID Database
Table SⅤ Bioinformatics analysis predicts that linc01614 may interact with multiple proteins and RNAs
catRAPID Database
http://s.tartaglialab.com/page/catrapid_group
Protein ID	RNA ID	Interaction Propensity	Z-score
A2RTX5 TARS3	untitled.rna	55.21	1.76
A5YKK6 CNOT1	untitled.rna	50.07	1.47
B5MCY1 TDRD15	untitled.rna	57.47	1.89
B5ME19 EIF3CL	untitled.rna	55.91	1.8
O00410 IPO5	untitled.rna	61.07	2.09
O00411 POLRMT	untitled.rna	50.87	1.51
O00566 MPHOSPH10	untitled.rna	70.4	2.62
O14647 CHD2	untitled.rna	56.55	1.84
O14776 TCERG1	untitled.rna	81.77	3.26
O14787 TNPO2	untitled.rna	65.4	2.34
O14980 XPO1	untitled.rna	56.98	1.86
O15037 KHNYN	untitled.rna	55.98	1.8
O15042 U2SURP	untitled.rna	61.86	2.14
O15381 NVL	untitled.rna	54.14	1.7
O15397 IPO8	untitled.rna	65.91	2.37
O15455 TLR3	untitled.rna	57.19	1.87
O43143 DHX15	untitled.rna	51.08	1.53
O43290 SART1	untitled.rna	76.38	2.96
O43395 PRPF3	untitled.rna	53.09	1.64
O43432 EIF4G3	untitled.rna	56.3	1.82
O43491 EPB41L2	untitled.rna	63.78	2.25
O43592 XPOT	untitled.rna	63.27	2.22
O43707 ACTN4	untitled.rna	61.18	2.1
O43719 HTATSF1	untitled.rna	83.93	3.39
O43823 AKAP8	untitled.rna	61.34	2.11
O43896 KIF1C	untitled.rna	62.19	2.15
O60231 DHX16	untitled.rna	59.84	2.02
O60271 SPAG9	untitled.rna	60.57	2.06
O60287 URB1	untitled.rna	69.7	2.58
O60293 ZFC3H1	untitled.rna	83.3	3.35
O60294 LCMT2	untitled.rna	57.5	1.89
O60306 AQR	untitled.rna	54.34	1.71
O60518 RANBP6	untitled.rna	54.11	1.7
O60522 TDRD6	untitled.rna	70.49	2.62
O60716 CTNND1	untitled.rna	58.6	1.95
O60763 USO1	untitled.rna	65.25	2.33
O60841 EIF5B	untitled.rna	49.96	1.46
O75113 N4BP1	untitled.rna	55.93	1.8
O75116 ROCK2	untitled.rna	70.61	2.63
O75152 ZC3H11A	untitled.rna	62.72	2.19
O75179 ANKRD17	untitled.rna	56.9	1.86
O75400 PRPF40A	untitled.rna	62.42	2.17
O75460 ERN1	untitled.rna	61.55	2.12
O75534 CSDE1	untitled.rna	67.93	2.48
O75643 SNRNP200	untitled.rna	72.14	2.72
O75691 UTP20	untitled.rna	53.28	1.65
O94804 STK10	untitled.rna	79.11	3.11
O94829 IPO13	untitled.rna	57.73	1.9
O94906 PRPF6	untitled.rna	56.27	1.82
O94913 PCF11	untitled.rna	52.39	1.6
O94979 SEC31A	untitled.rna	49.04	1.41
O95373 IPO7	untitled.rna	65.46	2.34
O95786 DDX58	untitled.rna	54.19	1.7
P02751 FN1	untitled.rna	50.52	1.5
P02786 TFRC	untitled.rna	49.41	1.43
P04114 APOB	untitled.rna	66.27	2.39
P05023 ATP1A1	untitled.rna	66.1	2.38
P07814 EPRS1	untitled.rna	61.69	2.13
P07900 HSP90AA1	untitled.rna	50.25	1.48
P08238 HSP90AB1	untitled.rna	50.85	1.51
P09327 VIL1	untitled.rna	69.97	2.6
P09874 PARP1	untitled.rna	62.92	2.2
P0CG48 UBC	untitled.rna	55.33	1.77
P11171 EPB41	untitled.rna	61.21	2.1
P11387 TOP1	untitled.rna	60.56	2.06
P11388 TOP2A	untitled.rna	53.29	1.65
P11498 PC	untitled.rna	59.61	2.01
P13010 XRCC5	untitled.rna	64.61	2.29
P13639 EEF2	untitled.rna	60.75	2.07
P14625 HSP90B1	untitled.rna	79.51	3.14
P15924 DSP	untitled.rna	64.51	2.29
P16383 GCFC2	untitled.rna	67.49	2.46
P17480 UBTF	untitled.rna	61.46	2.11
P18583 SON	untitled.rna	51.24	1.53
P19338 NCL	untitled.rna	51.89	1.57
P20810 CAST	untitled.rna	56.5	1.83
P21127 CDK11B	untitled.rna	77.03	3
P21333 FLNA	untitled.rna	60.12	2.04
P21399 ACO1	untitled.rna	59.77	2.02
P22314 UBA1	untitled.rna	54.27	1.71
P24043 LAMA2	untitled.rna	53.06	1.64
P24928 POLR2A	untitled.rna	63.32	2.22
P26358 DNMT1	untitled.rna	50.21	1.48
P26639 TARS1	untitled.rna	69.5	2.57
P26640 VARS1	untitled.rna	67.35	2.45
P27816 MAP4	untitled.rna	63.74	2.24
P29375 KDM5A	untitled.rna	56.33	1.82
P29728 OAS2	untitled.rna	52.47	1.6
P30414 NKTR	untitled.rna	61.8	2.13
P30876 POLR2B	untitled.rna	56.21	1.82
P35221 CTNNA1	untitled.rna	75.07	2.88
P35579 MYH9	untitled.rna	57.09	1.87
P36776 LONP1	untitled.rna	75.41	2.9
P38398 BRCA1	untitled.rna	49.6	1.44
P38646 HSPA9	untitled.rna	66.8	2.42
P38935 IGHMBP2	untitled.rna	50.88	1.51
P41252 IARS1	untitled.rna	72.65	2.75
P42166 TMPO	untitled.rna	52.77	1.62
P42285 MTREX	untitled.rna	49.44	1.43
P42694 HELZ	untitled.rna	56.54	1.84
P42704 LRPPRC	untitled.rna	64.03	2.26
P43243 MATR3	untitled.rna	67.11	2.43
P46087 NOP2	untitled.rna	62.87	2.19
P46459 NSF	untitled.rna	76.89	2.99
P46821 MAP1B	untitled.rna	65.55	2.35
P47897 QARS1	untitled.rna	54.91	1.74
P48200 IREB2	untitled.rna	56.99	1.86
P48357 LEPR	untitled.rna	49.72	1.45
P48634 PRRC2A	untitled.rna	52.99	1.63
P49588 AARS1	untitled.rna	50.73	1.51
P49589 CARS1	untitled.rna	75.88	2.93
P49756 RBM25	untitled.rna	48.77	1.4
P49790 NUP153	untitled.rna	55.19	1.76
P49792 RANBP2	untitled.rna	72.09	2.72
P51116 FXR2	untitled.rna	51.05	1.52
P51816 AFF2	untitled.rna	52.08	1.58
P51825 AFF1	untitled.rna	53.09	1.64
P51826 AFF3	untitled.rna	51.19	1.53
P52756 RBM5	untitled.rna	57.19	1.87
P53618 COPB1	untitled.rna	66.56	2.4
P54253 ATXN1	untitled.rna	79.7	3.15
P54277 PMS1	untitled.rna	82.46	3.3
P54886 ALDH18A1	untitled.rna	61.56	2.12
P55060 CSE1L	untitled.rna	59.56	2.01
P55072 VCP	untitled.rna	62.98	2.2
P55196 AFDN	untitled.rna	66.65	2.41
P55265 ADAR	untitled.rna	50.47	1.49
P55884 EIF3B	untitled.rna	49.75	1.45
P56192 MARS1	untitled.rna	52.23	1.59
P57678 GEMIN4	untitled.rna	70.88	2.65
P58107 EPPK1	untitled.rna	61.28	2.1
P59045 NLRP11	untitled.rna	56.6	1.84
P61129 ZC3H6	untitled.rna	50.62	1.5
P78316 NOP14	untitled.rna	64.03	2.26
P78332 RBM6	untitled.rna	65.17	2.32
P78344 EIF4G2	untitled.rna	60.4	2.05
P78527 PRKDC	untitled.rna	61.47	2.12
P98175 RBM10	untitled.rna	59.75	2.02
Q00341 HDLBP	untitled.rna	65.67	2.35
Q00610 CLTC	untitled.rna	55.45	1.77
Q00839 HNRNPU	untitled.rna	65.05	2.32
Q01082 SPTBN1	untitled.rna	66.83	2.42
Q01780 EXOSC10	untitled.rna	56.97	1.86
Q01974 ROR2	untitled.rna	63.38	2.22
Q03701 CEBPZ	untitled.rna	69.39	2.56
Q04637 EIF4G1	untitled.rna	75.68	2.92
Q05193 DNM1	untitled.rna	63.61	2.24
Q05209 PTPN12	untitled.rna	56.08	1.81
Q05682 CALD1	untitled.rna	72.55	2.74
Q05707 COL14A1	untitled.rna	66.59	2.4
Q05823 RNASEL	untitled.rna	62.96	2.2
Q07954 LRP1	untitled.rna	56.38	1.83
Q08211 DHX9	untitled.rna	70.03	2.6
Q08945 SSRP1	untitled.rna	49.82	1.46
Q08J23 NSUN2	untitled.rna	51.12	1.53
Q09161 NCBP1	untitled.rna	56.68	1.84
Q09666 AHNAK	untitled.rna	48.58	1.38
Q12788 TBL3	untitled.rna	58.9	1.97
Q12872 SFSWAP	untitled.rna	61.19	2.1
Q12873 CHD3	untitled.rna	58.18	1.93
Q12931 TRAP1	untitled.rna	51.99	1.58
Q12955 ANK3	untitled.rna	55.01	1.75
Q12996 CSTF3	untitled.rna	54.41	1.72
Q13144 EIF2B5	untitled.rna	67.14	2.44
Q13206 DDX10	untitled.rna	74.94	2.88
Q13395 TARBP1	untitled.rna	57.04	1.86
Q13427 PPIG	untitled.rna	52.08	1.58
Q13435 SF3B2	untitled.rna	63.32	2.22
Q13439 GOLGA4	untitled.rna	68.71	2.52
Q13523 PRPF4B	untitled.rna	54.75	1.73
Q13769 THOC5	untitled.rna	58.76	1.96
Q13813 SPTAN1	untitled.rna	57.11	1.87
Q13823 GNL2	untitled.rna	51.16	1.53
Q14004 CDK13	untitled.rna	66.2	2.38
Q14137 BOP1	untitled.rna	49.09	1.41
Q14146 URB2	untitled.rna	58.46	1.94
Q14147 DHX34	untitled.rna	63.22	2.21
Q14151 SAFB2	untitled.rna	68.56	2.52
Q14152 EIF3A	untitled.rna	72.29	2.73
Q14241 ELOA	untitled.rna	70.47	2.62
Q14527 HLTF	untitled.rna	50.92	1.52
Q14562 DHX8	untitled.rna	49.75	1.45
Q14667 KIAA0100	untitled.rna	51.68	1.56
Q14676 MDC1	untitled.rna	50.74	1.51
Q14683 SMC1A	untitled.rna	50.4	1.49
Q14684 RRP1B	untitled.rna	52.84	1.63
Q14690 PDCD11	untitled.rna	65.26	2.33
Q14692 BMS1	untitled.rna	79.24	3.12
Q14697 GANAB	untitled.rna	61.97	2.14
Q14764 MVP	untitled.rna	57.64	1.9
Q14789 GOLGB1	untitled.rna	63.54	2.23
Q14966 ZNF638	untitled.rna	48.52	1.38
Q14974 KPNB1	untitled.rna	61.26	2.1
Q14980 NUMA1	untitled.rna	73.67	2.81
Q15020 SART3	untitled.rna	63.69	2.24
Q15022 SUZ12	untitled.rna	78.66	3.09
Q15031 LARS2	untitled.rna	53.24	1.65
Q15061 WDR43	untitled.rna	77.57	3.03
Q15149 PLEC	untitled.rna	59.88	2.02
Q15269 PWP2	untitled.rna	51.98	1.58
Q15393 SF3B3	untitled.rna	67.05	2.43
Q15397 PUM3	untitled.rna	48.47	1.38
Q15424 SAFB	untitled.rna	61.95	2.14
Q15459 SF3A1	untitled.rna	64.62	2.29
Q15477 SKIV2L	untitled.rna	53.48	1.66
Q16513 PKN2	untitled.rna	52.48	1.61
Q16666 IFI16	untitled.rna	53.8	1.68
Q16891 IMMT	untitled.rna	57.76	1.9
Q1KMD3 HNRNPUL2	untitled.rna	49.54	1.44
Q29RF7 PDS5A	untitled.rna	62.33	2.16
Q2NL82 TSR1	untitled.rna	55.32	1.77
Q2Q1W2 TRIM71	untitled.rna	48.23	1.36
Q2TBE0 CWF19L2	untitled.rna	52.75	1.62
Q32MZ4 LRRFIP1	untitled.rna	70.37	2.62
Q53GS7 GLE1	untitled.rna	61.02	2.09
Q53R41 FASTKD1	untitled.rna	48.88	1.4
Q587J7 TDRD12	untitled.rna	51.49	1.55
Q58A45 PAN3	untitled.rna	61.35	2.11
Q5C9Z4 NOM1	untitled.rna	48.35	1.37
Q5H9U9 DDX60L	untitled.rna	53.96	1.69
Q5JTH9 RRP12	untitled.rna	51.15	1.53
Q5JTZ9 AARS2	untitled.rna	58.17	1.93
Q5QJE6 DNTTIP2	untitled.rna	59.14	1.98
Q5T0F9 CC2D1B	untitled.rna	66.92	2.42
Q5T5J6 SWT1	untitled.rna	64.28	2.27
Q5T7N2 L1TD1	untitled.rna	83.51	3.36
Q5T8P6 RBM26	untitled.rna	52.58	1.61
Q5TAP6 UTP14C	untitled.rna	59.07	1.98
Q5TAX3 TUT4	untitled.rna	51.03	1.52
Q5UIP0 RIF1	untitled.rna	51.67	1.56
Q5VT52 RPRD2	untitled.rna	50.84	1.51
Q5VYS8 TUT7	untitled.rna	61.49	2.12
Q5XG87 TENT4A	untitled.rna	52.55	1.61
Q659C4 LARP1B	untitled.rna	51.95	1.58
Q68CQ4 DIEXF	untitled.rna	51.98	1.58
Q68E01 INTS3	untitled.rna	51.98	1.58
Q69YN4 VIRMA	untitled.rna	66.88	2.42
Q6IMN6 CAPRIN2	untitled.rna	65.29	2.33
Q6NSI4 RADX	untitled.rna	50.39	1.49
Q6NUQ4 TMEM214	untitled.rna	49.99	1.47
Q6NWY9 PRPF40B	untitled.rna	65.7	2.35
Q6NXG1 ESRP1	untitled.rna	50.9	1.52
Q6P3W6 NBPF10	untitled.rna	50.59	1.5
Q6P9B9 INTS5	untitled.rna	64.43	2.28
Q6PKG0 LARP1	untitled.rna	75.56	2.91
Q6Y7W6 GIGYF2	untitled.rna	67.26	2.44
Q6ZP01 RBM44	untitled.rna	56.4	1.83
Q6ZU64 CFAP65	untitled.rna	63.34	2.22
Q702N8 XIRP1	untitled.rna	52.89	1.63
Q75QN2 INTS8	untitled.rna	55.42	1.77
Q76FK4 NOL8	untitled.rna	55.83	1.8
Q76MJ5 ERN2	untitled.rna	52.43	1.6
Q7KZ85 SUPT6H	untitled.rna	74.68	2.86
Q7KZF4 SND1	untitled.rna	70.41	2.62
Q7L014 DDX46	untitled.rna	70.78	2.64
Q7L7V1 DHX32	untitled.rna	68.87	2.53
Q7L8L6 FASTKD5	untitled.rna	57.55	1.89
Q7Z2T5 TRMT1L	untitled.rna	50.65	1.5
Q7Z2Z2 EFL1	untitled.rna	64.04	2.26
Q7Z333 SETX	untitled.rna	68.37	2.5
Q7Z3Z3 PIWIL3	untitled.rna	53.43	1.66
Q7Z3Z4 PIWIL4	untitled.rna	64.52	2.29
Q7Z406 MYH14	untitled.rna	65.28	2.33
Q7Z417 NUFIP2	untitled.rna	53.45	1.66
Q7Z478 DHX29	untitled.rna	52.79	1.62
Q7Z5L2 R3HCC1L	untitled.rna	59.93	2.03
Q7Z6E9 RBBP6	untitled.rna	58.67	1.96
Q7Z6Z7 HUWE1	untitled.rna	53.95	1.69
Q86TB9 PATL1	untitled.rna	49.27	1.42
Q86UA1 PRPF39	untitled.rna	57.33	1.88
Q86UP2 KTN1	untitled.rna	71.74	2.7
Q86UR5 RIMS1	untitled.rna	64.85	2.31
Q86US8 SMG6	untitled.rna	76.04	2.94
Q86VP6 CAND1	untitled.rna	64.92	2.31
Q86XP3 DDX42	untitled.rna	63.06	2.21
Q86Y13 DZIP3	untitled.rna	60.93	2.08
Q86YF9 DZIP1	untitled.rna	53.07	1.64
Q8IWA0 WDR75	untitled.rna	56.46	1.83
Q8IWR0 ZC3H7A	untitled.rna	52.18	1.59
Q8IWX8 CHERP	untitled.rna	51.5	1.55
Q8IWZ3 ANKHD1	untitled.rna	52.88	1.63
Q8IX01 SUGP2	untitled.rna	62.16	2.15
Q8IX12 CCAR1	untitled.rna	76.34	2.96
Q8IX18 DHX40	untitled.rna	55.65	1.78
Q8IXT5 RBM12B	untitled.rna	66.33	2.39
Q8IY21 DDX60	untitled.rna	72.88	2.76
Q8IY81 FTSJ3	untitled.rna	57.67	1.9
Q8IYB8 SUPV3L1	untitled.rna	56.85	1.85
Q8IYL2 TRMT44	untitled.rna	69.94	2.59
Q8IYT2 CMTR2	untitled.rna	56.44	1.83
Q8IYY4 DZIP1L	untitled.rna	54.07	1.7
Q8IZH2 XRN1	untitled.rna	54.05	1.69
Q8N163 CCAR2	untitled.rna	66.02	2.37
Q8N1G2 CMTR1	untitled.rna	74	2.82
Q8N1W1 ARHGEF28	untitled.rna	63.96	2.26
Q8N201 INTS1	untitled.rna	57.39	1.88
Q8N302 AGGF1	untitled.rna	57.62	1.9
Q8N3C0 ASCC3	untitled.rna	61.15	2.1
Q8N5C6 SRBD1	untitled.rna	64.74	2.3
Q8N5U6 RNF10	untitled.rna	62	2.15
Q8NAT2 TDRD5	untitled.rna	59.4	2
Q8NBJ9 SIDT2	untitled.rna	52.78	1.62
Q8NC60 NOA1	untitled.rna	50.07	1.47
Q8NCM8 DYNC2H1	untitled.rna	61.67	2.13
Q8ND04 SMG8	untitled.rna	50.71	1.5
Q8NDG6 TDRD9	untitled.rna	55.83	1.8
Q8NDT2 RBM15B	untitled.rna	64.61	2.29
Q8NEZ4 KMT2C	untitled.rna	50.16	1.47
Q8NHU6 TDRD7	untitled.rna	59.82	2.02
Q8NI27 THOC2	untitled.rna	57.74	1.9
Q8NI36 WDR36	untitled.rna	56.45	1.83
Q8TC59 PIWIL2	untitled.rna	61.47	2.12
Q8TCS8 PNPT1	untitled.rna	61.28	2.1
Q8TDD1 DDX54	untitled.rna	58.46	1.94
Q8TEQ6 GEMIN5	untitled.rna	53.83	1.68
Q8TEX9 IPO4	untitled.rna	74.13	2.83
Q8TF01 PNISR	untitled.rna	51.78	1.57
Q8TF46 DIS3L	untitled.rna	58.72	1.96
Q8WTT2 NOC3L	untitled.rna	60.63	2.07
Q8WUM4 PDCD6IP	untitled.rna	70.29	2.61
Q8WUQ7 CACTIN	untitled.rna	59.14	1.98
Q8WXH0 SYNE2	untitled.rna	75.18	2.89
Q8WYQ5 DGCR8	untitled.rna	66.87	2.42
Q8WYQ9 ZCCHC14	untitled.rna	51.52	1.55
Q92499 DDX1	untitled.rna	60.05	2.03
Q92541 RTF1	untitled.rna	57.42	1.88
Q92576 PHF3	untitled.rna	51.36	1.54
Q92614 MYO18A	untitled.rna	71.2	2.66
Q92616 GCN1	untitled.rna	66.06	2.37
Q92620 DHX38	untitled.rna	67.74	2.47
Q92667 AKAP1	untitled.rna	59.51	2
Q92797 SYMPK	untitled.rna	67.31	2.44
Q92834 RPGR	untitled.rna	69.57	2.57
Q92888 ARHGEF1	untitled.rna	75.89	2.93
Q92900 UPF1	untitled.rna	79.49	3.13
Q92945 KHSRP	untitled.rna	64.34	2.28
Q92973 TNPO1	untitled.rna	55.16	1.76
Q92974 ARHGEF2	untitled.rna	64.26	2.27
Q93073 SECISBP2L	untitled.rna	52.5	1.61
Q969S9 GFM2	untitled.rna	65.21	2.33
Q969X6 UTP4	untitled.rna	53.48	1.66
Q96EK7 FAM120B	untitled.rna	58.66	1.96
Q96EY7 PTCD3	untitled.rna	58.69	1.96
Q96FV9 THOC1	untitled.rna	55.27	1.76
Q96GQ7 DDX27	untitled.rna	63.6	2.23
Q96HW7 INTS4	untitled.rna	71.96	2.71
Q96J94 PIWIL1	untitled.rna	62.53	2.17
Q96KR1 ZFR	untitled.rna	75.23	2.89
Q96P70 IPO9	untitled.rna	51.98	1.58
Q96Q15 SMG1	untitled.rna	69.63	2.58
Q96QU8 XPO6	untitled.rna	60.33	2.05
Q96RP9 GFM1	untitled.rna	55.35	1.77
Q96RS0 TGS1	untitled.rna	57.1	1.87
Q96SD1 DCLRE1C	untitled.rna	56.3	1.82
Q96T21 SECISBP2	untitled.rna	66	2.37
Q96T58 SPEN	untitled.rna	54.66	1.73
Q99459 CDC5L	untitled.rna	70.88	2.65
Q99575 POP1	untitled.rna	51.09	1.53
Q99590 SCAF11	untitled.rna	67.98	2.48
Q99613 EIF3C	untitled.rna	56.7	1.84
Q99676 ZNF184	untitled.rna	49.95	1.46
Q99700 ATXN2	untitled.rna	58.88	1.97
Q99728 BARD1	untitled.rna	52.91	1.63
Q99798 ACO2	untitled.rna	57.15	1.87
Q99973 TEP1	untitled.rna	55.52	1.78
Q9BQ52 ELAC2	untitled.rna	59.48	2
Q9BQG0 MYBBP1A	untitled.rna	57.21	1.87
Q9BRZ2 TRIM56	untitled.rna	58.95	1.97
Q9BSC4 NOL10	untitled.rna	59.51	2
Q9BU23 LMF2	untitled.rna	48.52	1.38
Q9BUQ8 DDX23	untitled.rna	76.46	2.96
Q9BVJ6 UTP14A	untitled.rna	60.36	2.05
Q9BW92 TARS2	untitled.rna	57.25	1.88
Q9BWU0 SLC4A1AP	untitled.rna	86.6	3.54
Q9BX66 SORBS1	untitled.rna	64.99	2.31
Q9BXJ9 NAA15	untitled.rna	61.75	2.13
Q9BXP5 SRRT	untitled.rna	52.81	1.62
Q9BXT4 TDRD1	untitled.rna	79.22	3.12
Q9BXT6 MOV10L1	untitled.rna	61.73	2.13
Q9BXT8 RNF17	untitled.rna	60.06	2.04
Q9BYK8 HELZ2	untitled.rna	55.67	1.79
Q9BYX4 IFIH1	untitled.rna	71.58	2.69
Q9BZJ0 CRNKL1	untitled.rna	61.07	2.09
Q9C0B0 UNK	untitled.rna	64.07	2.26
Q9C0B9 ZCCHC2	untitled.rna	56.05	1.81
Q9C0C9 UBE2O	untitled.rna	66.71	2.41
Q9C0D7 ZC3H12C	untitled.rna	51.2	1.53
Q9C0E2 XPO4	untitled.rna	64.41	2.28
Q9GZR7 DDX24	untitled.rna	57.7	1.9
Q9H000 MKRN2	untitled.rna	59.34	1.99
Q9H0D6 XRN2	untitled.rna	59.87	2.02
Q9H0H0 INTS2	untitled.rna	58.56	1.95
Q9H0J9 PARP12	untitled.rna	48.83	1.4
Q9H0K6 PUS7L	untitled.rna	48.68	1.39
Q9H2T7 RANBP17	untitled.rna	61.19	2.1
Q9H2U1 DHX36	untitled.rna	66.93	2.42
Q9H2Y7 ZNF106	untitled.rna	60.08	2.04
Q9H307 PNN	untitled.rna	52.04	1.58
Q9H501 ESF1	untitled.rna	78.6	3.08
Q9H583 HEATR1	untitled.rna	59.71	2.02
Q9H6R4 NOL6	untitled.rna	58.91	1.97
Q9H8H2 DDX31	untitled.rna	49.99	1.47
Q9H9A5 CNOT10	untitled.rna	62.11	2.15
Q9H9G7 AGO3	untitled.rna	52.79	1.62
Q9H9J4 USP42	untitled.rna	56.95	1.86
Q9H9P5 UNKL	untitled.rna	58.24	1.93
Q9HAV4 XPO5	untitled.rna	54.92	1.74
Q9HBE1 PATZ1	untitled.rna	55.5	1.78
Q9HBL0 TNS1	untitled.rna	57	1.86
Q9HCE1 MOV10	untitled.rna	73.83	2.81
Q9HCG8 CWC22	untitled.rna	61.63	2.12
Q9HCK5 AGO4	untitled.rna	55.88	1.8
Q9HCM7 FBRSL1	untitled.rna	48.69	1.39
Q9HCS7 XAB2	untitled.rna	78.92	3.1
Q9NNW5 WDR6	untitled.rna	51.13	1.53
Q9NP73 ALG13	untitled.rna	48.13	1.36
Q9NQC3 RTN4	untitled.rna	58.3	1.94
Q9NQI0 DDX4	untitled.rna	55	1.75
Q9NR30 DDX21	untitled.rna	52.6	1.61
Q9NR48 ASH1L	untitled.rna	58.56	1.95
Q9NR97 TLR8	untitled.rna	57.97	1.92
Q9NRA8 EIF4ENIF1	untitled.rna	73.99	2.82
Q9NRC6 SPTBN5	untitled.rna	62.25	2.16
Q9NRR4 DROSHA	untitled.rna	67.39	2.45
Q9NTZ6 RBM12	untitled.rna	48.27	1.37
Q9NV66 TYW1	untitled.rna	57.56	1.89
Q9NV88 INTS9	untitled.rna	54.96	1.75
Q9NVH2 INTS7	untitled.rna	51	1.52
Q9NVR2 INTS10	untitled.rna	56.66	1.84
Q9NVR5 DNAAF2	untitled.rna	58.49	1.95
Q9NVU7 SDAD1	untitled.rna	63.35	2.22
Q9NW13 RBM28	untitled.rna	56.44	1.83
Q9NWH9 SLTM	untitled.rna	58.18	1.93
Q9NX05 FAM120C	untitled.rna	56.68	1.84
Q9NXL6 SIDT1	untitled.rna	51.96	1.58
Q9NXZ2 DDX43	untitled.rna	49.94	1.46
Q9NYF8 BCLAF1	untitled.rna	56.35	1.82
Q9NYK1 TLR7	untitled.rna	57.06	1.86
Q9NYY8 FASTKD2	untitled.rna	50.52	1.5
Q9NZB2 FAM120A	untitled.rna	55.06	1.75
Q9NZJ5 EIF2AK3	untitled.rna	68.58	2.52
Q9P2E3 ZNFX1	untitled.rna	62.1	2.15
Q9P2E9 RRBP1	untitled.rna	64.54	2.29
Q9P2I0 CPSF2	untitled.rna	53.93	1.69
Q9P2J5 LARS1	untitled.rna	63.6	2.23
Q9P2K8 EIF2AK4	untitled.rna	53.92	1.69
Q9P2M7 CGN	untitled.rna	70.03	2.6
Q9P2N5 RBM27	untitled.rna	55.95	1.8
Q9UBB9 TFIP11	untitled.rna	66.55	2.4
Q9UBC3 DNMT3B	untitled.rna	50.84	1.51
Q9UBK2 PPARGC1A	untitled.rna	53.42	1.66
Q9UEY8 ADD3	untitled.rna	59.51	2
Q9UGP8 SEC63	untitled.rna	83.3	3.35
Q9UGU0 TCF20	untitled.rna	58.58	1.95
Q9UHB6 LIMA1	untitled.rna	51.96	1.58
Q9UHB7 AFF4	untitled.rna	56.84	1.85
Q9UHI6 DDX20	untitled.rna	53.22	1.65
Q9UI17 DMGDH	untitled.rna	65.59	2.35
Q9UI26 IPO11	untitled.rna	62.36	2.17
Q9UIA9 XPO7	untitled.rna	59.65	2.01
Q9UIF8 BAZ2B	untitled.rna	84.04	3.39
Q9UIF9 BAZ2A	untitled.rna	50.76	1.51
Q9UIG0 BAZ1B	untitled.rna	64.27	2.27
Q9UII4 HERC5	untitled.rna	60.59	2.06
Q9UJC3 HOOK1	untitled.rna	64.53	2.29
Q9UK61 TASOR	untitled.rna	64.43	2.28
Q9UKF6 CPSF3	untitled.rna	52.81	1.62
Q9UKJ3 GPATCH8	untitled.rna	49.65	1.45
Q9UKK3 PARP4	untitled.rna	58.6	1.95
Q9UKV3 ACIN1	untitled.rna	61.5	2.12
Q9UL18 AGO1	untitled.rna	48.26	1.37
Q9ULW0 TPX2	untitled.rna	66.21	2.38
Q9UNX4 WDR3	untitled.rna	58.17	1.93
Q9UNY4 TTF2	untitled.rna	48.9	1.4
Q9UPN6 SCAF8	untitled.rna	60.82	2.08
Q9UPQ9 TNRC6B	untitled.rna	59.96	2.03
Q9UPR6 ZFR2	untitled.rna	63.72	2.24
Q9UPS6 SETD1B	untitled.rna	54.56	1.72
Q9UPT8 ZC3H4	untitled.rna	63.68	2.24
Q9UQ84 EXO1	untitled.rna	49.91	1.46
Q9Y223 GNE	untitled.rna	53.58	1.67
Q9Y2L1 DIS3	untitled.rna	66.73	2.41
Q9Y2W1 THRAP3	untitled.rna	66.91	2.42
Q9Y2Z2 MTO1	untitled.rna	58.43	1.94
Q9Y3T9 NOC2L	untitled.rna	68.19	2.5
Q9Y450 HBS1L	untitled.rna	54.25	1.71
Q9Y490 TLN1	untitled.rna	51.27	1.54
Q9Y4B5 MTCL1	untitled.rna	53.79	1.68
Q9Y4C8 RBM19	untitled.rna	58.37	1.94
Q9Y4F3 MARF1	untitled.rna	50.4	1.49
Q9Y4I1 MYO5A	untitled.rna	48.99	1.41
Q9Y4W2 LAS1L	untitled.rna	49.38	1.43
Q9Y520 PRRC2C	untitled.rna	64.4	2.28
Q9Y5B9 SUPT16H	untitled.rna	68.81	2.53
Q9Y5G4 PCDHGA9	untitled.rna	58.11	1.92
Q9Y5L0 TNPO3	untitled.rna	49.08	1.41
Q9Y608 LRRFIP2	untitled.rna	68.19	2.5
Q9Y678 COPG1	untitled.rna	64.95	2.31
Q9Y6K5 OAS3	untitled.rna	58.78	1.96
Q9Y6Y8 SEC23IP	untitled.rna	70.29	2.61

## Sheet: Table SⅤ RNAInter Database
Table SV. RNAInter database.
http://www.rnainter.org/
RNAInter_ID	Interactor1	Category1	Interactor2	Category2
RP03075741	LINC01614	lncRNA	TCF21	TF
RP03025048	LINC01614	lncRNA	ARNT	TF
RP03015336	LINC01614	lncRNA	HIF1A	TF
RP03001174	LINC01614	lncRNA	KDM1B	protein
RP02992426	LINC01614	lncRNA	RB1	TF
RP02977924	LINC01614	lncRNA	PDX1	TF
RP02937435	LINC01614	lncRNA	CHD8	TF
RP02930589	LINC01614	lncRNA	IRF4	TF
RP02910885	LINC01614	lncRNA	CBX5	TF
RP02873309	LINC01614	lncRNA	TEAD1	TF
RP02832405	LINC01614	lncRNA	SMAD2	TF
RP02821842	LINC01614	lncRNA	GATA4	TF
RP02816023	LINC01614	lncRNA	SMAD3	TF
RP02794676	LINC01614	lncRNA	ZNF217	TF
RP02772659	LINC01614	lncRNA	FOXC1	TF
RP02695667	LINC01614	lncRNA	HEYL	TF
RP02668692	LINC01614	lncRNA	MYOD1	TF
RP02255368	LINC01614	lncRNA	SPDEF	TF
RP02203241	LINC01614	lncRNA	FOSL1	TF
RP02190368	LINC01614	lncRNA	UBN1	protein
RP02187332	LINC01614	lncRNA	HIRA	TF
RP02179571	LINC01614	lncRNA	ASF1A	TF
RP02160507	LINC01614	lncRNA	MBD3	TF
RP02135942	LINC01614	lncRNA	PGR	TF
RP02080349	LINC01614	lncRNA	NR2F2	TF
RP02047704	LINC01614	lncRNA	AGO1	TF
RP02043208	LINC01614	lncRNA	E2F7	TF
RP02028214	LINC01614	lncRNA	NKX2-1	TF
RP01984336	LINC01614	lncRNA	POU5F1	TF
RP01857724	LINC01614	lncRNA	SMARCA4	TF
RP01846220	LINC01614	lncRNA	EOMES	TF
RP01797128	LINC01614	lncRNA	GATA6	TF
RP01783098	LINC01614	lncRNA	CDX2	TF
RP01761237	LINC01614	lncRNA	PPARG	TF
RP01732956	LINC01614	lncRNA	TP63	TF
RP01696294	LINC01614	lncRNA	ZNF598	protein
RP01673081	LINC01614	lncRNA	STAG1	TF
RP01650893	LINC01614	lncRNA	NME2	TF
RP01631914	LINC01614	lncRNA	AR	TF
RP01611081	LINC01614	lncRNA	CEBPA	TF
RP01596908	LINC01614	lncRNA	TP73	TF
RP01595011	LINC01614	lncRNA	STAT1	TF
RP01593292	LINC01614	lncRNA	CEBPD	TF
RP01586145	LINC01614	lncRNA	CUX1	TF
RP01565140	LINC01614	lncRNA	ZNF384	TF
RP01547452	LINC01614	lncRNA	GATA1	TF
RP01540738	LINC01614	lncRNA	PBX3	TF
RP01523429	LINC01614	lncRNA	FOXM1	TF
RP01476136	LINC01614	lncRNA	SIRT6	TF
RP01474095	LINC01614	lncRNA	KDM5B	TF
RP01438843	LINC01614	lncRNA	KDM1A	TF
RP01429685	LINC01614	lncRNA	CBX3	TF
RP01407044	LINC01614	lncRNA	SUZ12	TF
RP01398813	LINC01614	lncRNA	CHD4	TF
RP01369736	LINC01614	lncRNA	MAZ	TF
RP01361235	LINC01614	lncRNA	ARID3A	TF
RP01324196	LINC01614	lncRNA	TBL1XR1	TF
RP01298897	LINC01614	lncRNA	E2F4	TF
RP01281040	LINC01614	lncRNA	RCOR1	TF
RP01268536	LINC01614	lncRNA	MYC	TF
RP01267404	LINC01614	lncRNA	IRF1	TF
RP01264075	LINC01614	lncRNA	MAX	TF
RP01253052	LINC01614	lncRNA	EZH2	TF
RP01229374	LINC01614	lncRNA	MYBL2	TF
RP01216768	LINC01614	lncRNA	TEAD4	TF
RP01207424	LINC01614	lncRNA	RUNX3	TF
RP01176856	LINC01614	lncRNA	NFIC	TF
RP01171942	LINC01614	lncRNA	MBD4	TF
RP01127701	LINC01614	lncRNA	BCL3	TF
RP01126904	LINC01614	lncRNA	TAF1	TF
RP01126240	LINC01614	lncRNA	ZBTB7A	TF
RP01120446	LINC01614	lncRNA	SIN3A	TF
RP01119844	LINC01614	lncRNA	REST	TF
RP01105234	LINC01614	lncRNA	KDM5A	TF
RP01090102	LINC01614	lncRNA	SAP30	TF
RP01062518	LINC01614	lncRNA	HDAC1	TF
RP01040462	LINC01614	lncRNA	CHD1	TF
RP01027247	LINC01614	lncRNA	RBBP5	TF
RP01004078	LINC01614	lncRNA	NFYB	TF
RP00993183	LINC01614	lncRNA	GATA3	TF
RP00991722	LINC01614	lncRNA	ZNF143	TF
RP00991085	LINC01614	lncRNA	MXI1	TF
RP00974048	LINC01614	lncRNA	SUPT20H	TF
RP00961325	LINC01614	lncRNA	CCNT2	TF
RP00953749	LINC01614	lncRNA	HMGN3	TF
RP00943699	LINC01614	lncRNA	BHLHE40	TF
RP00916276	LINC01614	lncRNA	SMC3	TF
RP00903472	LINC01614	lncRNA	MAFK	TF
RP00891262	LINC01614	lncRNA	MAFF	TF
RP00838932	LINC01614	lncRNA	RFX5	TF
RP00791805	LINC01614	lncRNA	USF2	TF
RP00777746	LINC01614	lncRNA	TBP	TF
RP00752706	LINC01614	lncRNA	TCF7L2	TF
RP00733059	LINC01614	lncRNA	STAT3	TF
RP00715478	LINC01614	lncRNA	SETDB1	TF
RP00680981	LINC01614	lncRNA	HNF4G	TF
RP00671749	LINC01614	lncRNA	FOXA2	TF
RP00627523	LINC01614	lncRNA	HDAC2	TF
RP00616331	LINC01614	lncRNA	YY1	TF
RP00613397	LINC01614	lncRNA	EP300	TF
RP00612976	LINC01614	lncRNA	SRF	TF
RP00608189	LINC01614	lncRNA	RAD21	TF
RP00592553	LINC01614	lncRNA	HNF4A	TF
RP00590476	LINC01614	lncRNA	FOXA1	TF
RP00569850	LINC01614	lncRNA	ESR1	TF
RP00552374	LINC01614	lncRNA	MEF2A	TF
RP00540023	LINC01614	lncRNA	SP1	TF
RP00533289	LINC01614	lncRNA	TCF12	TF
RP00508952	LINC01614	lncRNA	RXRA	TF
RP00503039	LINC01614	lncRNA	HEY1	TF
RP00497073	LINC01614	lncRNA	FOSL2	TF
RP00483788	LINC01614	lncRNA	NR3C1	TF
RP00475752	LINC01614	lncRNA	PAX5	TF
RP00412129	LINC01614	lncRNA	SPI1	TF
RP00395060	LINC01614	lncRNA	USF1	TF
RP00379236	LINC01614	lncRNA	FOXP2	TF
RP00365034	LINC01614	lncRNA	JUND	TF
RP00357809	LINC01614	lncRNA	JUNB	TF
RP00347894	LINC01614	lncRNA	GATA2	TF
RP00343726	LINC01614	lncRNA	FOS	TF
RP00333954	LINC01614	lncRNA	CEBPB	TF
RP00313992	LINC01614	lncRNA	JUN	TF
RP00249630	LINC01614	lncRNA	POLR2A	protein
RP00248896	LINC01614	lncRNA	CTCF	TF
RP00197248	LINC01614	lncRNA	SOX2	TF
RP00180234	LINC01614	lncRNA	BRD4	TF
RP00169201	LINC01614	lncRNA	RUNX1	TF
RP00142480	LINC01614	lncRNA	TRIM28	TF
RP00132794	LINC01614	lncRNA	TCF4	TF
RP00126066	LINC01614	lncRNA	TAL1	TF
RP00090066	LINC01614	lncRNA	SOX17	TF
RP00074825	LINC01614	lncRNA	SMAD4	TF
RP00062964	LINC01614	lncRNA	SMAD1	TF
RP00016427	LINC01614	lncRNA	OTX2	TF
RP00009008	LINC01614	lncRNA	NANOG	TF

## Sheet: Table SⅤ MIRcode  database
Table SV. MIRcode database.
http://www.mircode.org/
microRNA family	Seed position	Seed type
miR-93/93a/105/106a/291a-3p/294/295/302abcde/372/373/428/519a/520be/520acd-3p/1378/1420ac	chr2:216582817	7-mer-m8
miR-138/138ab	chr2:216582927	8-mer
miR-187	chr2:216583721	7-mer-m8
miR-18ab/4735-3p	chr2:216584045	7-mer-A1
miR-205/205ab	chr2:216582837	7-mer-A1
miR-217	chr2:216582910	8-mer
miR-34ac/34bc-5p/449abc/449c-5p	chr2:216584040	7-mer-A1
